# Supplementary material for: PRT062607 Achieves Complete Inhibition of the Spleen Tyrosine Kinase at Tolerated Exposures Following Oral Dosing in Healthy Volunteers
Source: PubMed Central journal article supplement — J Clin Pharmacol. 2016 Aug 17;57(2):194–210. doi: 10.1002/jcph.794 (PMC5248591; doi:10.1002/jcph.794), 2016-08-17
Supplement: JCPH-57-194-s001.pdf [file JCPH-57-194-s001.pdf]

# PRT62607 Achieves Complete Inhibition of the Spleen Tyrosine Kinase at Tolerated Exposures Following Oral Dosing in Healthy Volunteers

Coffey et al

## Supplemental Figure S1

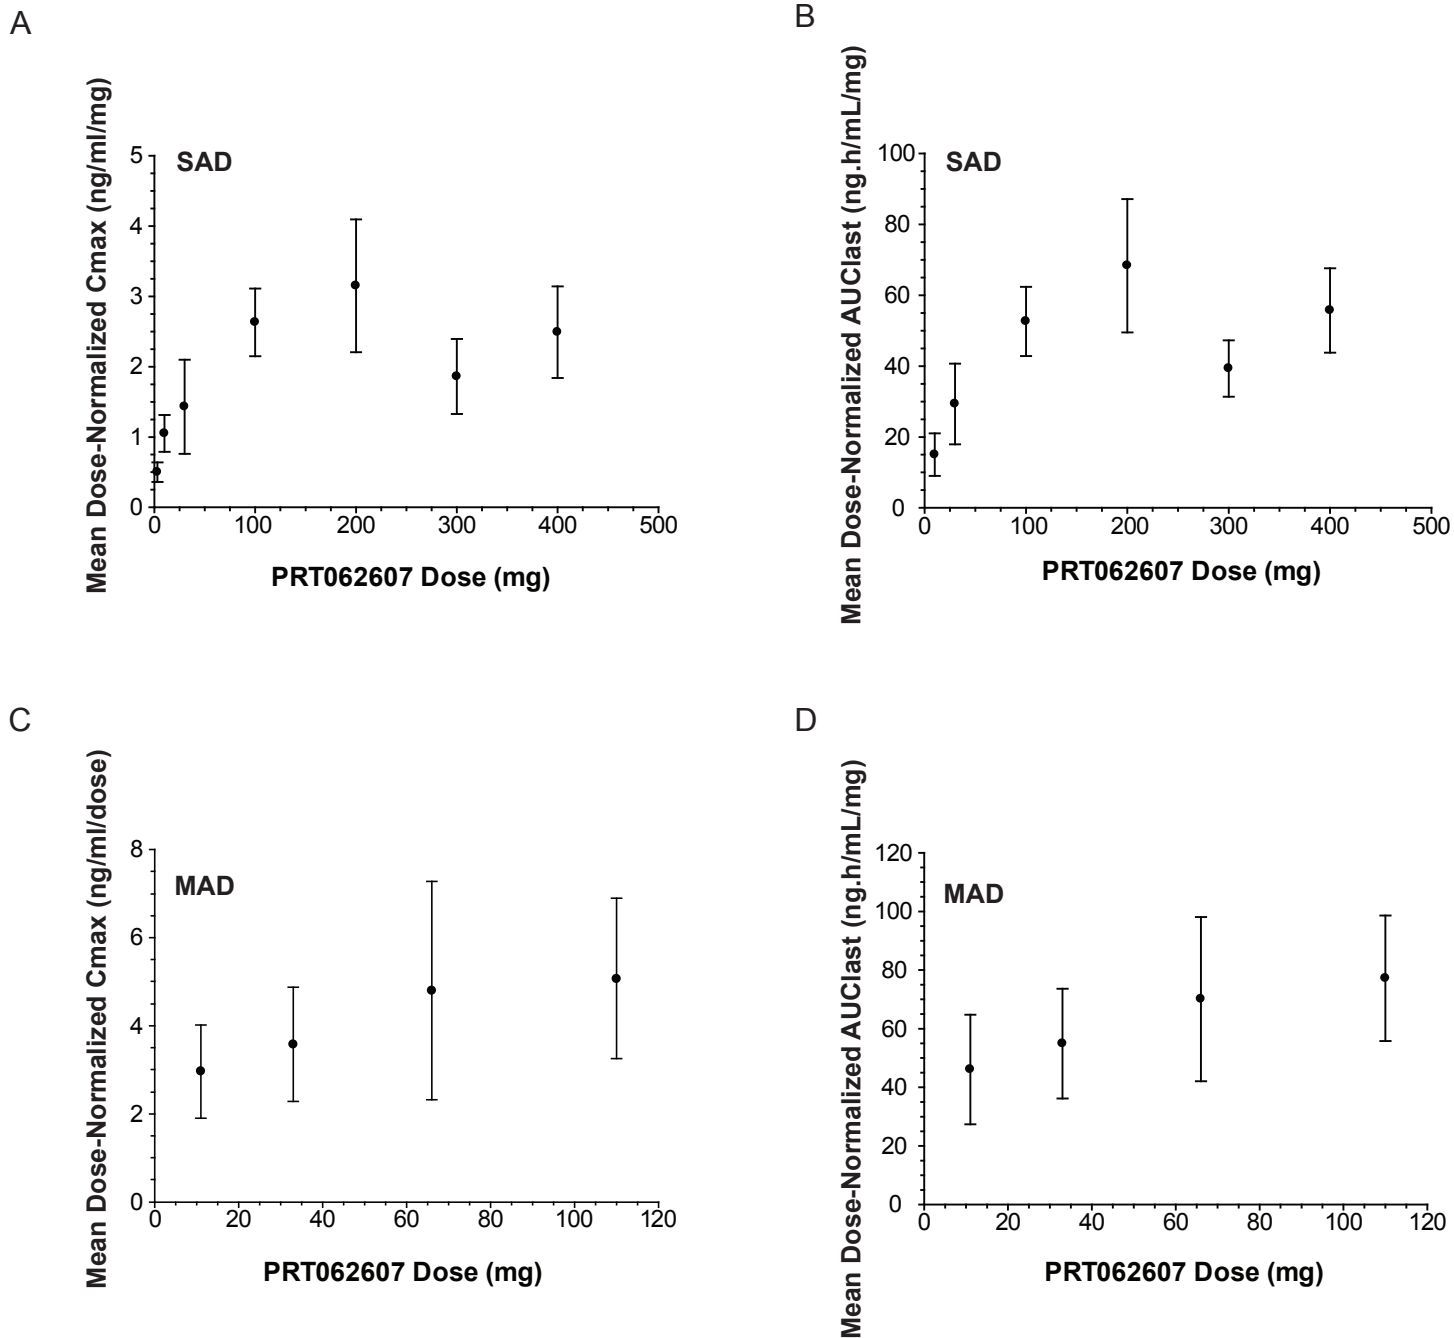

**Supplemental Figure S1: Relationship between Cmax, AUC, and Dose of PRT062607 following single and multiple oral administration of PRT062607.** Mean (SD) PRT062607 dose-normalized Cmax (A and C) and dose-normalized AUC (B and D) are related to dose for the SAD (A and B) and MAD (C and D) studies.
