# Supplementary material for: PRT062607 Achieves Complete Inhibition of the Spleen Tyrosine Kinase at Tolerated Exposures Following Oral Dosing in Healthy Volunteers
Source: PubMed Central journal article supplement — J Clin Pharmacol. 2016 Aug 17;57(2):194–210. doi: 10.1002/jcph.794 (PMC5248591; doi:10.1002/jcph.794), 2016-08-17
Supplement: JCPH-57-194-s003.pdf [file JCPH-57-194-s003.pdf]

Supplemental Table S1

A

| <b>Dose</b> | <b>C min <math>\mu\text{M}</math></b> | <b>C max <math>\mu\text{M}</math></b> | <b>C average <math>\mu\text{M}</math></b> | <b>% inhibition hind paw inflammation</b> |
|-------------|---------------------------------------|---------------------------------------|-------------------------------------------|-------------------------------------------|
| 5 mg/kg     | 0.18                                  | 0.7                                   | 0.51                                      | 31                                        |
| 10 mg/kg    | 0.28                                  | 0.89                                  | 0.72                                      | 55*                                       |
| 15 mg/kg    | 0.26                                  | 1.63                                  | 1.34                                      | 90*                                       |

B

| <b>10 mg/kg</b> | <b>Plasma conc. <math>\mu\text{M}</math></b> | <b>Extrapolated % Syk inhibition</b> |
|-----------------|----------------------------------------------|--------------------------------------|
| C min           | 0.28                                         | 21                                   |
| C max           | 0.89                                         | 47                                   |
| C average       | 0.72                                         | 40                                   |

---

Steady-state PK parameters and % inhibition hind paw inflammation from the rat CIA study are shown ( $\mu\text{M}$ ) for the 5, 10, and 15 mg/kg dose levels. Asterisks indicate statistically significant inhibition of hind paw inflammation ( $p < 0.05$ ). At the minimally effective dose (10 mg/kg) PK parameters are shown along with % SYK inhibition extrapolated from rat whole blood PK/PD curve fit.
